# Supplementary material
Source: PubMed Central journal article supplement (PMC3839566)

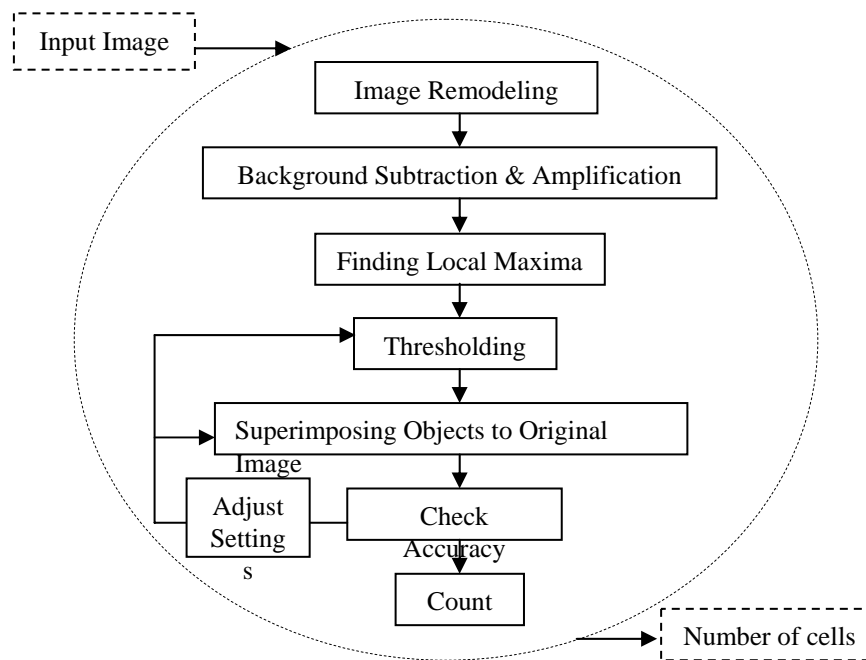

Supplement: NIHMS505463-supplement-Figure_1.pdf [file NIHMS505463-supplement-Figure_1.pdf]
